# Supplementary material for: Immune-regulated IDO1-dependent tryptophan metabolism is source of one-carbon units for pancreatic cancer and stellate cells
Source: PubMed Central journal article supplement (PMC8189438; doi:10.1016/j.molcel.2021.03.019), 2021-06-03
Supplement: mmc1.pdf [file mmc1.pdf]

**Molecular Cell, Volume 81**

**Supplemental information**

**Immune-regulated IDO1-dependent tryptophan  
metabolism is source of one-carbon units  
for pancreatic cancer and stellate cells**

**Alice Clare Newman, Mattia Falcone, Alejandro Huerta Uribe, Tong Zhang, Dimitris Athineos, Matthias Pietzke, Alexei Vazquez, Karen Blyth, and Oliver David Kenneth Maddocks**

Supplemental Figure 1.

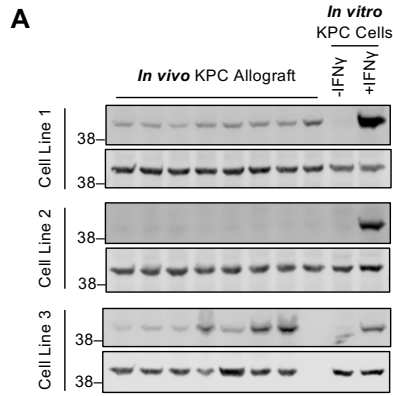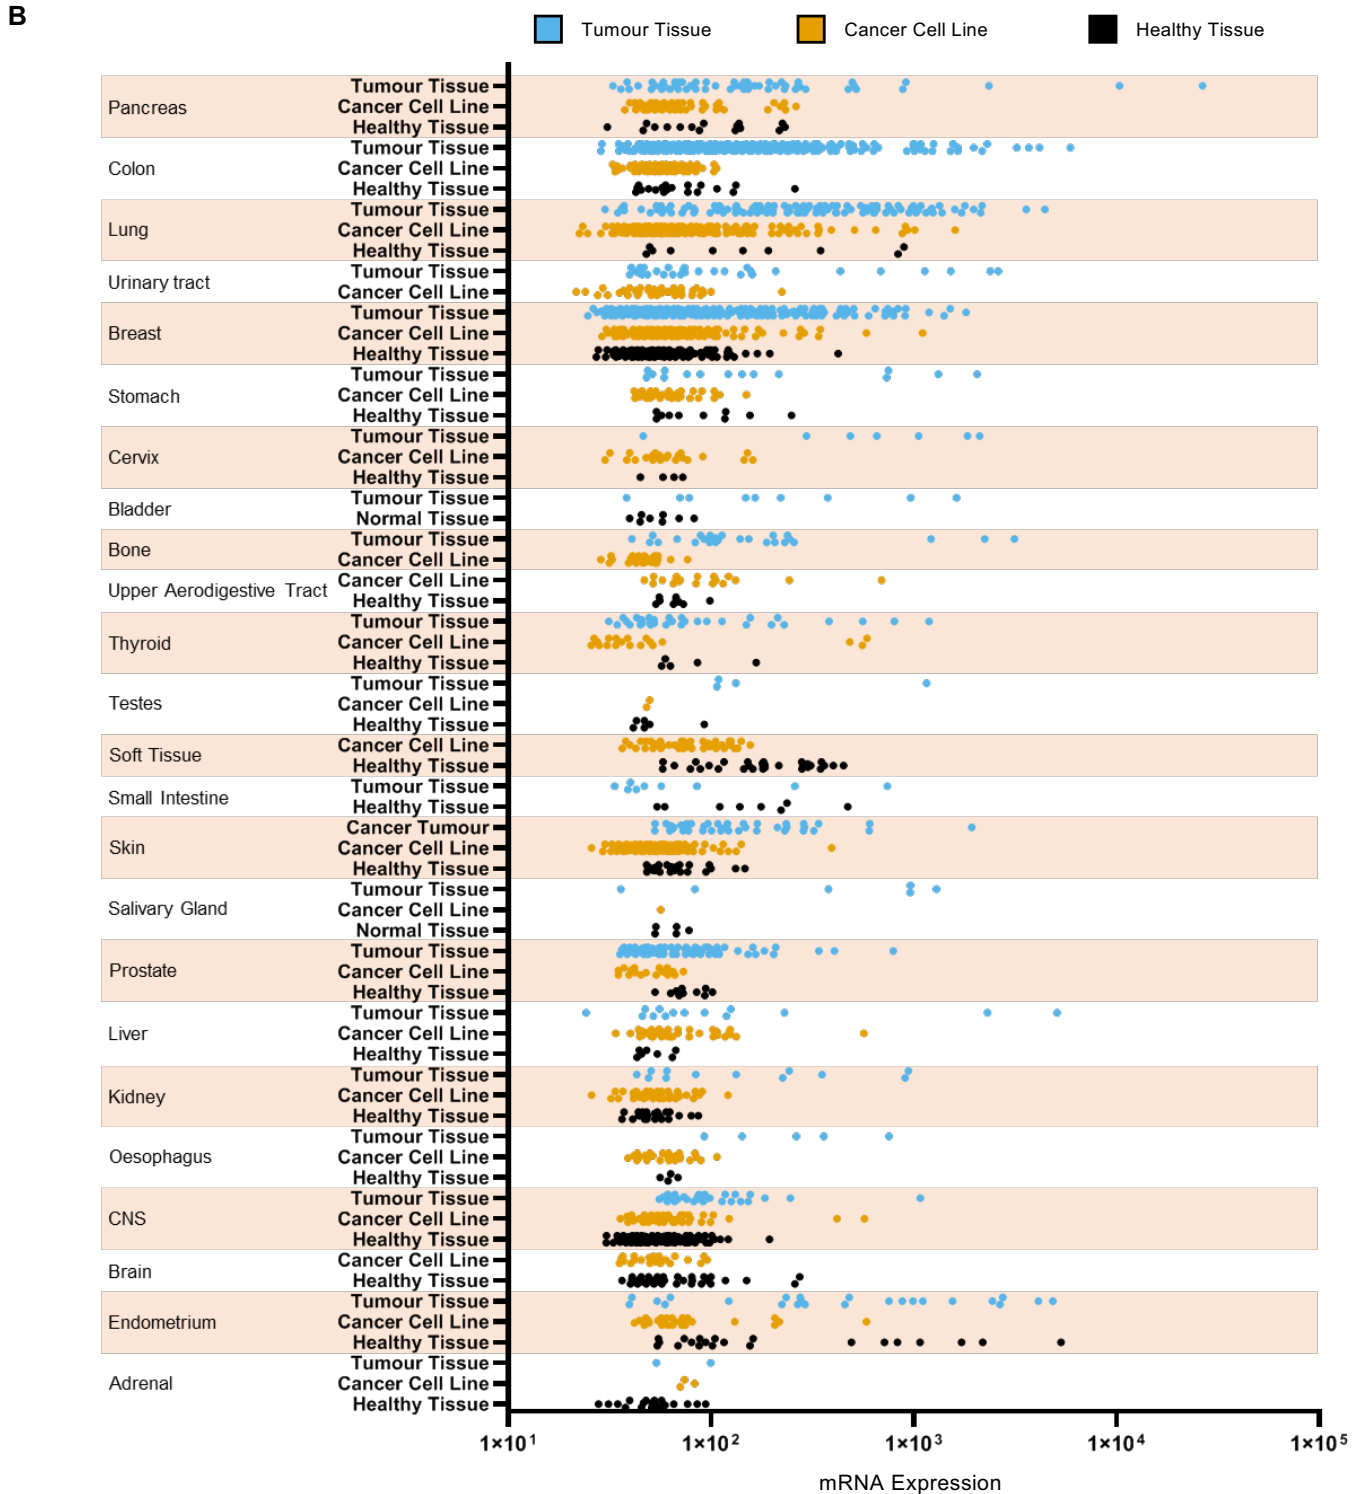

## Supplemental Figure 1.

### IDO1 expression in mouse and human tumours. Related to Figure 1.

**A**, KPC cells were isolated from C57Bl6/J *Pdx1-cre;Kras<sup>G12D/+</sup>;Trp53<sup>R172H/+</sup>* mice and either treated in culture with mouse IFN $\gamma$  (1ng/ml) for 24h or subcutaneously injected into the flank of C57Bl6/J mice to form tumours. Cell and tumour lysates were subjected to western blot for the indicated proteins. **B**, Data extracted from the MERAV database showing the relative abundance of IDO1 mRNA from microarray data across a range of human cell lines and tumour tissue (<http://merav.wi.mit.edu/>; Shaul, Y.D., Yuan, B., Thiru, P., Nutter-Upham, A., McCallum, S., Lanzkron, C., Bell, G.W., and Sabatini, D.M. (2016). MERAV: a tool for comparing gene expression across human tissues and cell types. *Nucleic acids research* 44, D560-566).

## Supplemental Figure 2.

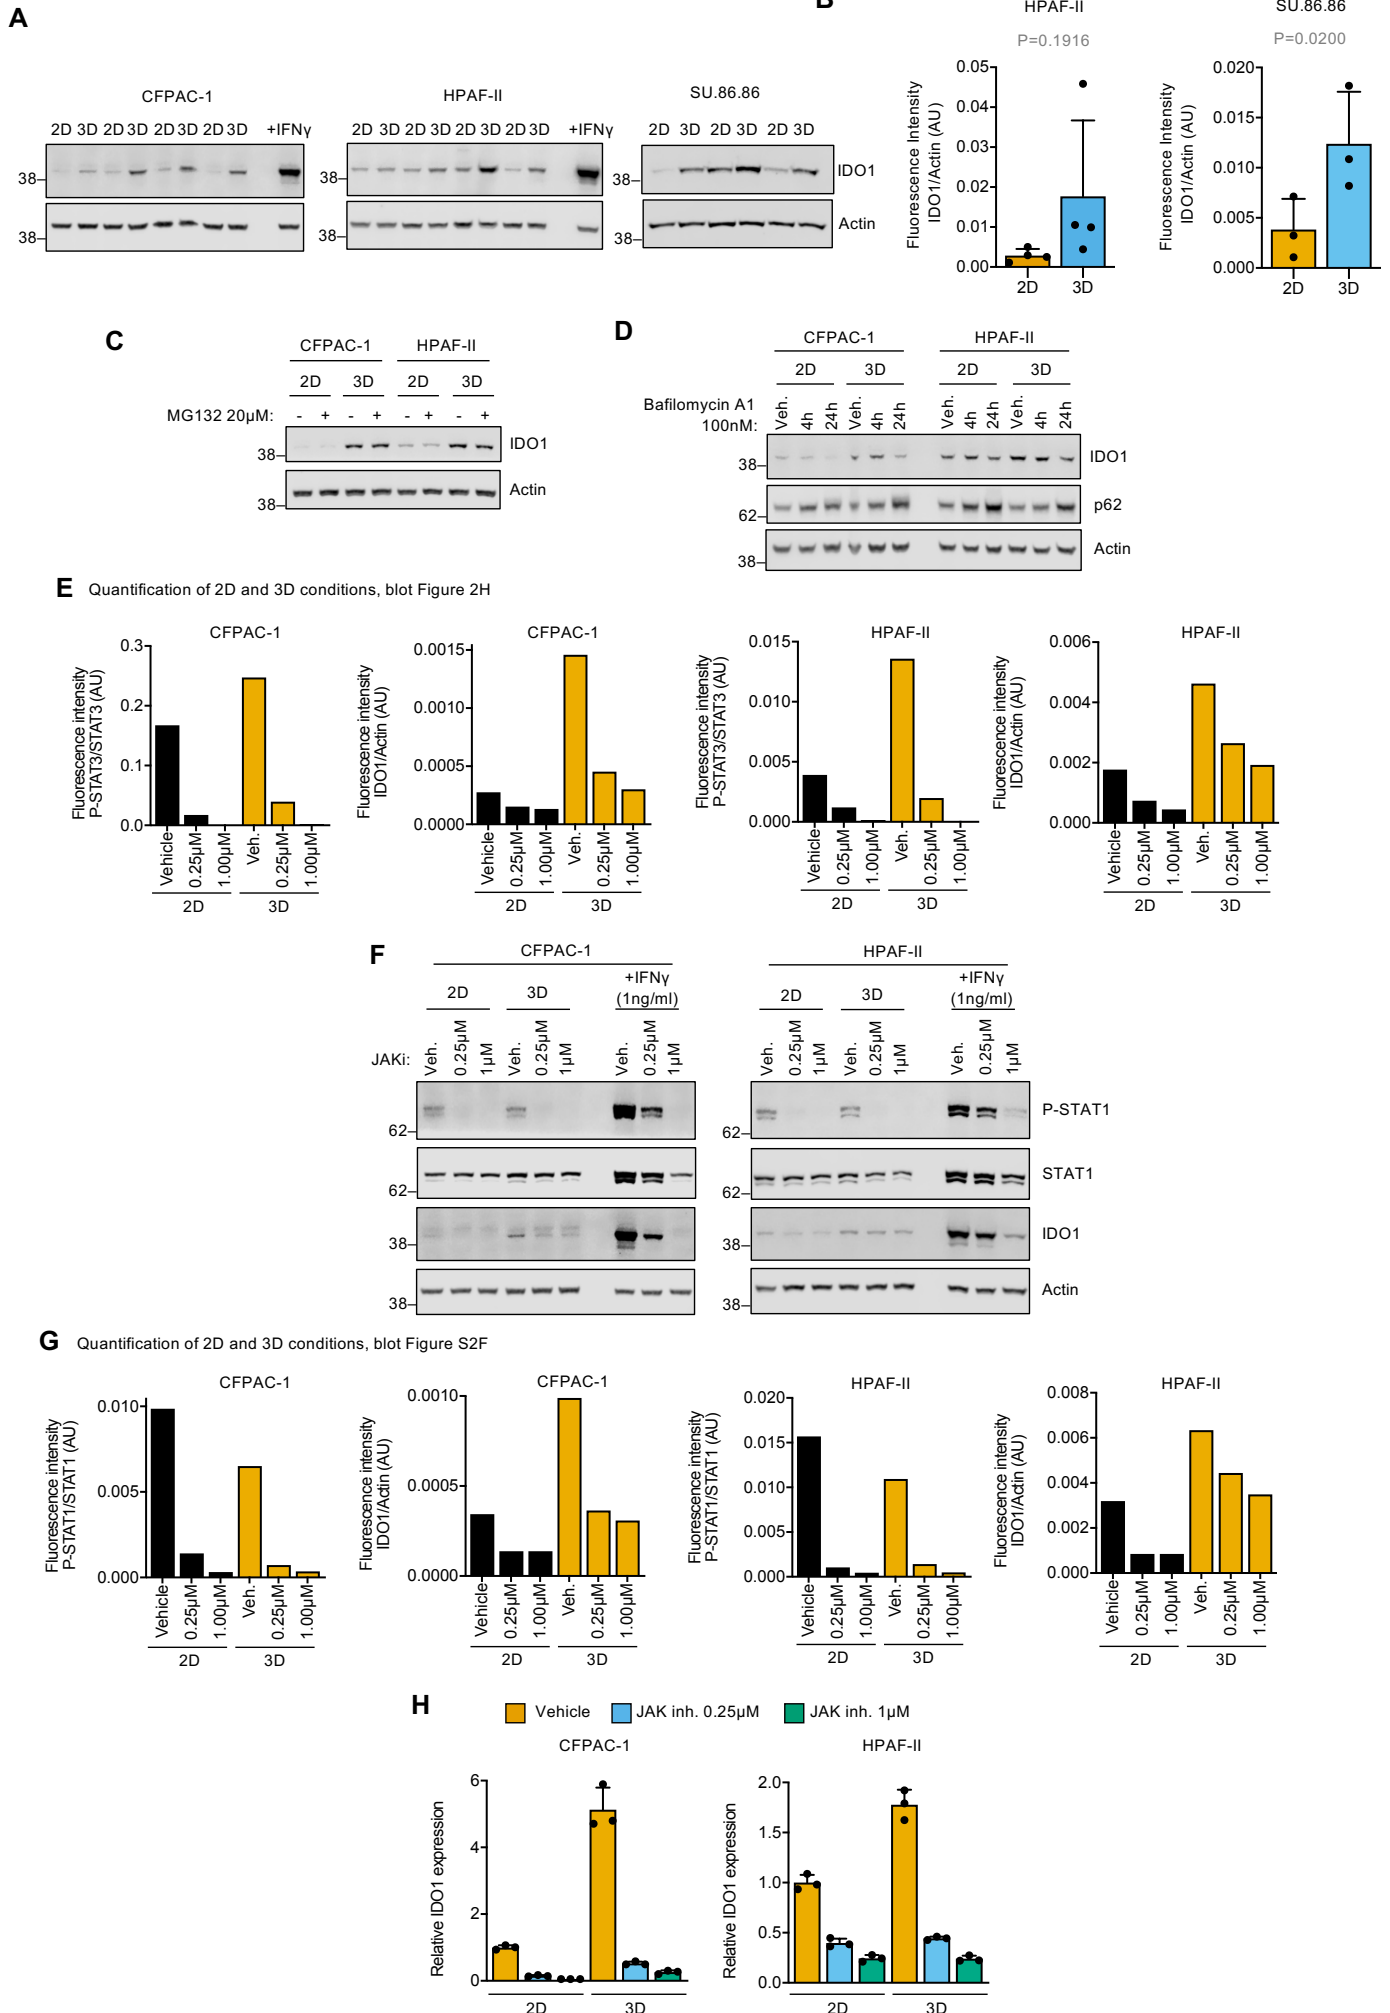



## Supplemental Figure 2.

### Regulation of IDO1 expression by attachment independent 3D growth. Related to Figure 2.

**A, B**, CFPAC-1, HPAF-II and SU.86.86 cells were either growth in normal tissue culture plates (2D) or in ultra-low-attachment tissue culture plates (3D) for 24h, or cultured in 2D and treated with 1ng/ml IFN $\gamma$ . Lysates were **(A)** analysed by western blot for the indicated proteins and **(B)** band intensity of IDO1 relative to actin (loading control) quantified using LiCor infra-red scanner (n=3 or 4 independent experiments, paired 2-sided t-test, P-value shown, bars = SD). **C-E**, CFPAC-1 and HPAF-II cells were grown in 2D or 3D conditions for 24 hours and lysates analysed by western blot for indicated proteins **(C)** after 16h treatment with proteasome inhibitor MG132 (20 $\mu$ M) or vehicle-only control **(D)** after treatment for the indicated times with lysosome inhibitor bafilomycin A1 (100nM) or vehicle-only control (p62 used as positive control for lysosomal regulation). **E**, Quantification of IDO1 and phospho-STAT3 band intensities using LiCor infra-red laser scanner for blot shown in Figure 2H. **F**, CFPAC-1 and HPAF-II cells were grown in 2D or 3D conditions for 24 hours and lysates analysed by western blot for indicated proteins after 16h treatment with JAKi (at indicated concentrations), vehicle-only control or IFN $\gamma$  (1ng/ml). **G**, Quantification of IDO1 and phospho-STAT1 band intensities using LiCor infra-red laser scanner for blot shown in Figure S2F. **H**, mRNA was extracted from CFPAC-1 and HPAF-II cells and subjected to qRT-PCR (n=3 biological replicates, bars = SD).

**Supplemental Figure 3.**

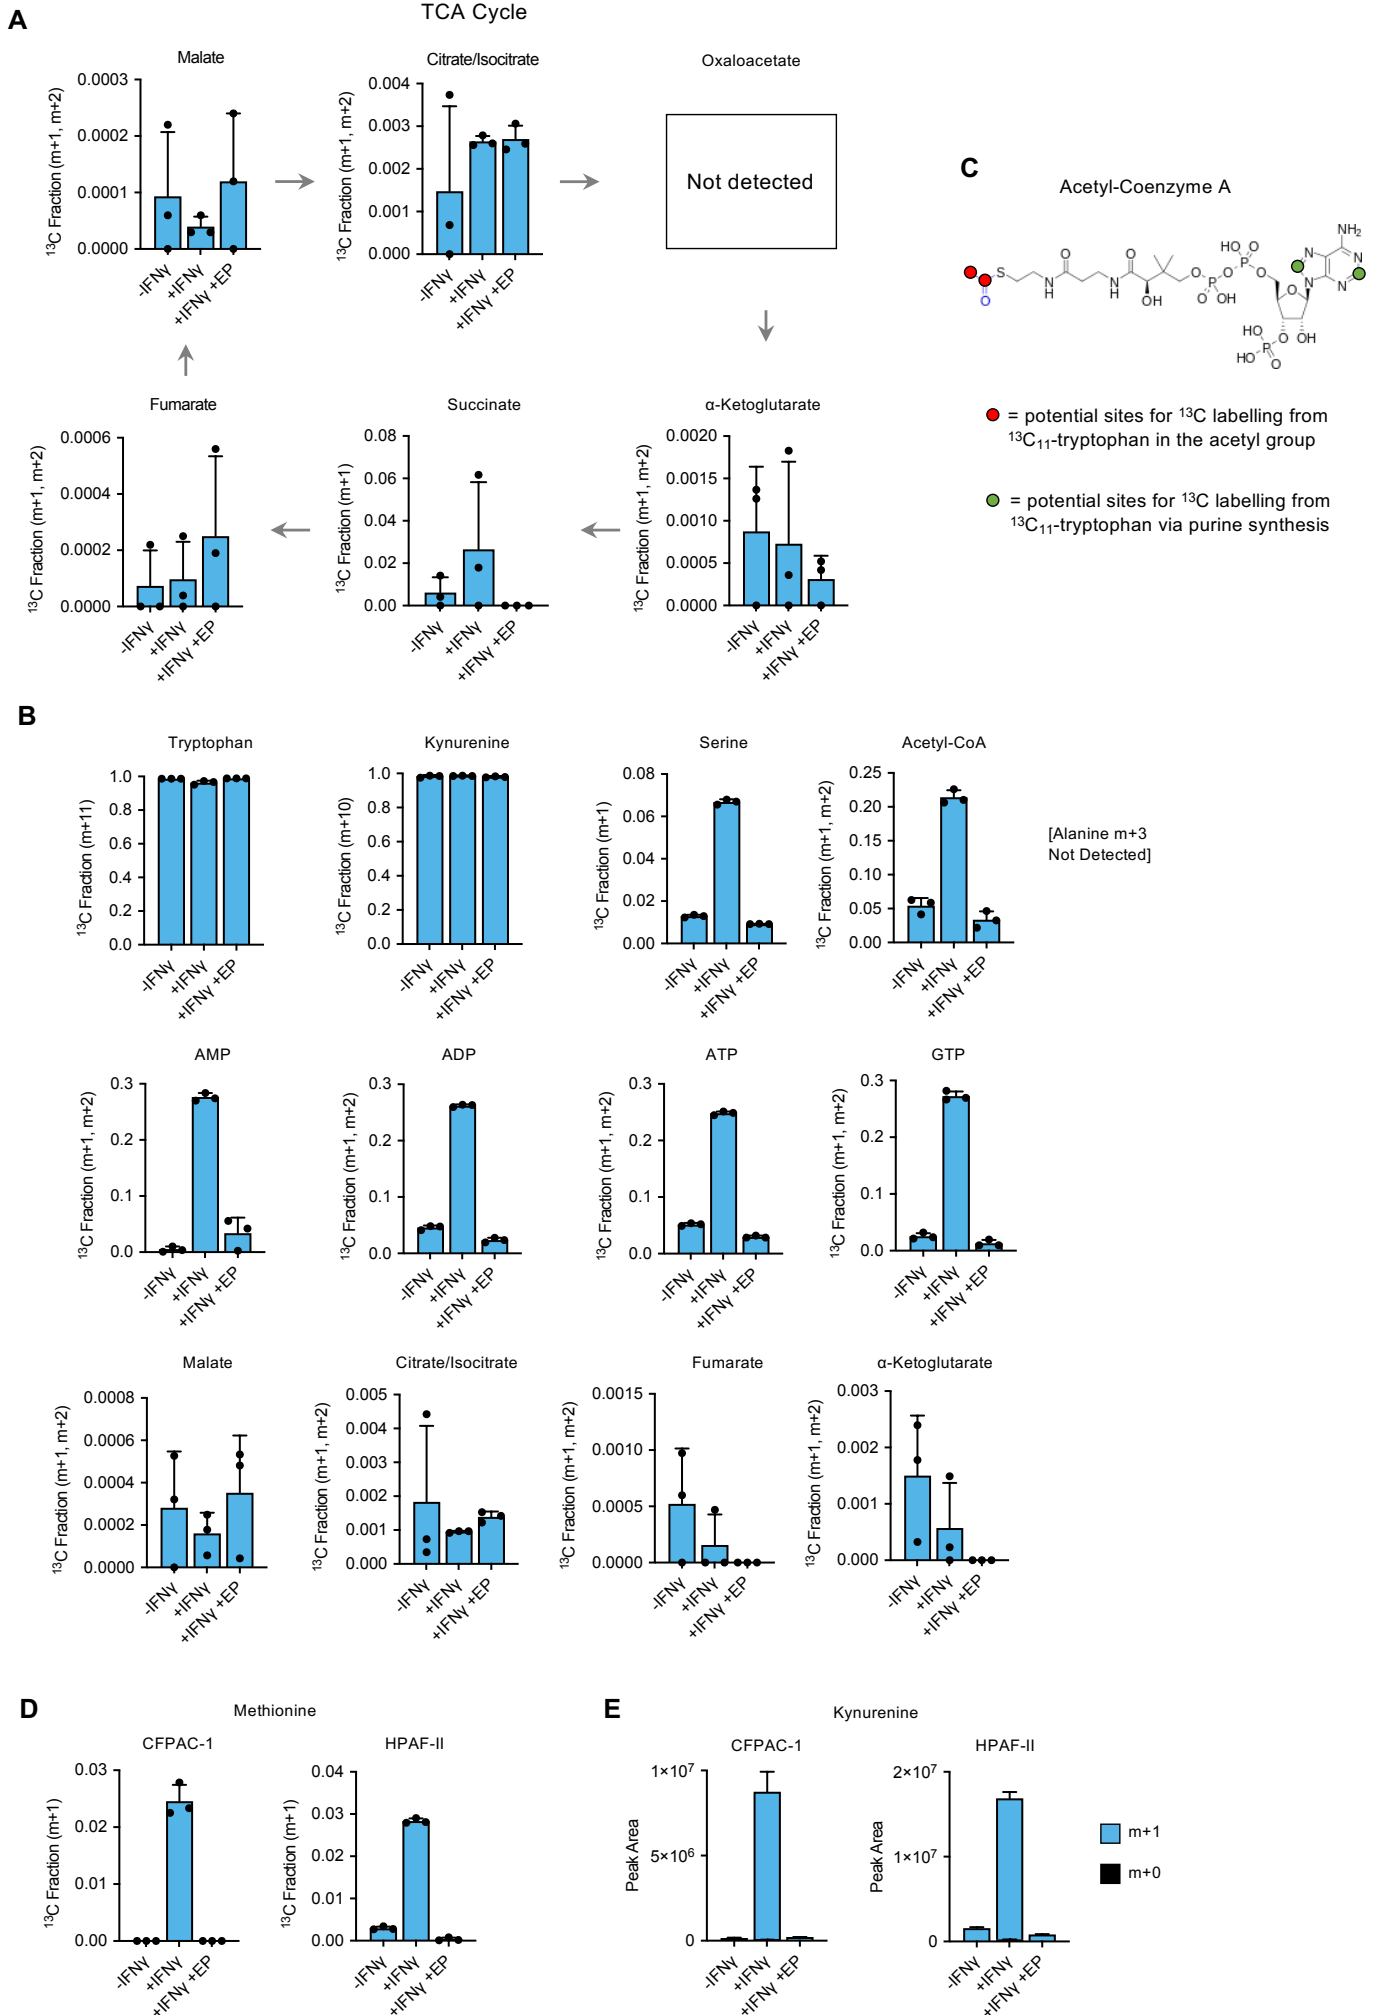

### Supplemental Figure 3.

#### IDO1-dependent tryptophan metabolism analysed by LCMS. Related to Figure 3.

**A & B**, CFPAC-1 (**A**) and HPAF-II (**B**) cells were grown with or without human IFN $\gamma$  (1ng/ml), or with IFN $\gamma$  and IDO1 inhibitor Epacadostat for 24h in the presence of  $^{13}\text{C}_{11}$ -tryptophan. Intracellular metabolites were analysed by LCMS and corrected for natural  $^{13}\text{C}$  abundance (n=3 biological replicates, bars = SD). **C**, The potential positions of tryptophan derived carbons are shown in a structural diagram of Acetyl-CoA. **D**, methionine levels detected by LCMS in the same experiments described in A & B above. **E**, Raw peak area values for kynurenine detected by LCMS are shown for the same experiments described in A & B above.

# Supplemental Figure 4.

**A**

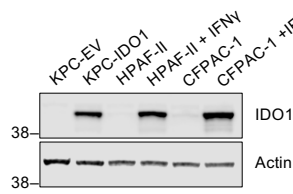

**B**

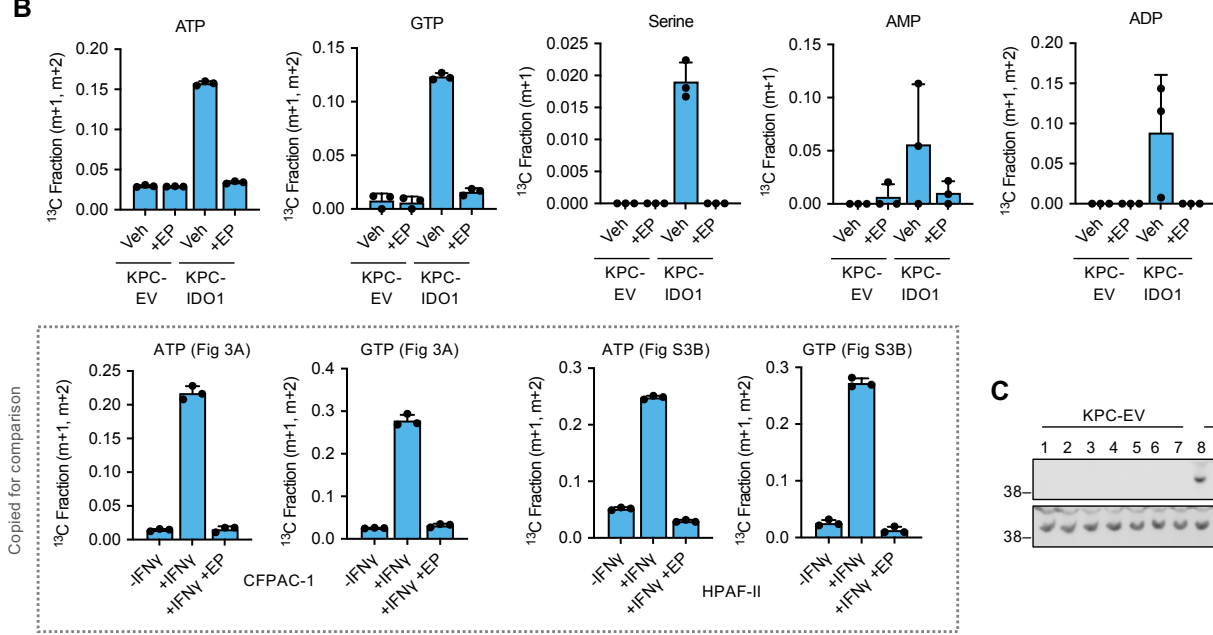

**C**

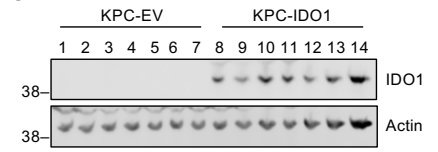

[Other purines not detected]

**D**

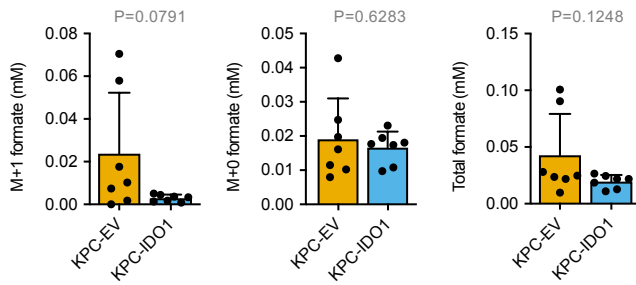

**E**

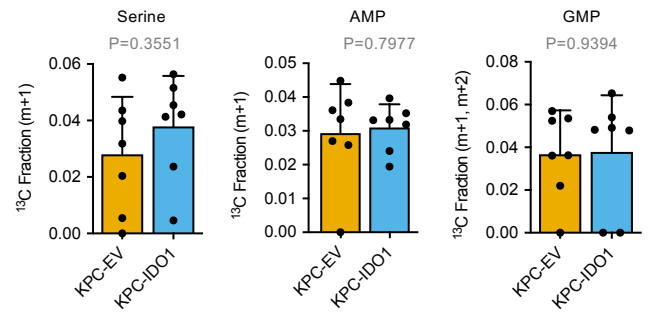

**F**

Immuno-competent context, endogenous IDO1 expressing tumour cells

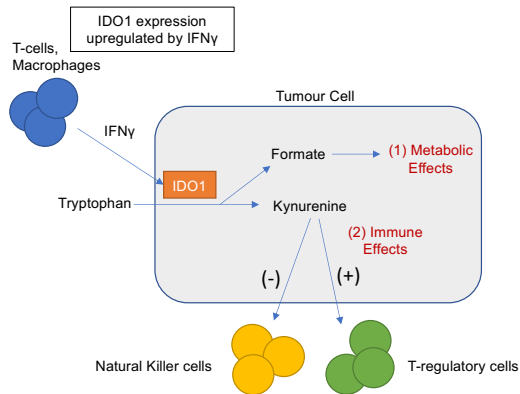

Inhibiting tumour IDO1 in this context will result in phenotypic changes to tumour growth due to two mechanisms:

1. Inhibiting the **metabolic** outcomes of IDO1 (e.g. nucleotide synthesis)
2. Inhibiting the **immunomodulatory** outcomes of IDO1 which, when active, create an immuno-permissive environment for tumour growth

Immuno-compromised context, stable IDO1 expressing tumour cells

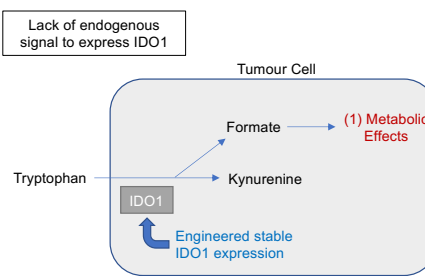

Lack of a competent immune system removes the immunomodulatory effects of IDO1 inhibition allowing specific interrogation of the metabolic effects.

I.e. Inhibiting tumour IDO1 in the immuno-compromised context will result in phenotypic changes to tumour growth due to:

1. Inhibiting the **metabolic** outcomes of IDO1 (e.g. nucleotide synthesis)

However, this system requires stable expression of IDO1 as the immune drive for IDO1 expression (via IFNγ) is also absent.

**G**

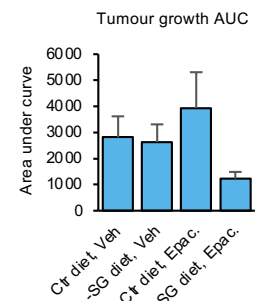

## Supplemental Figure 4.

### *In vivo* tryptophan metabolism. Related to Figure 4.

**A**, KPC cell line 2 (Figure 1E & S1A) from C57Bl6/J Pdx1-cre;*Kras*<sup>G12D/+</sup>;*Trp53*<sup>R172H/+</sup> mice were engineered to stably express IDO1 (KPC-IDO1) or empty-vector control (KPC-EV), protein lysates from cells were analysed by western blot for IDO1 expression alongside CFPAC-1 and HPAF-II cells which had been treated with human IFN $\gamma$  (1ng/ml) for 24h. **B**, KPC-EV and KPC-IDO1 cells were grown with or without IDO1 inhibitor Epacadostat for 24h in the presence of <sup>13</sup>C<sub>11</sub>-tryptophan. Intracellular metabolites were analysed by LCMS and corrected for natural <sup>13</sup>C abundance (n=3 biological replicates, bars = SD). ATP and GTP LCMS data for IFN $\gamma$ /epacadostat treated CFPAC-1 and HPAF-II cells (copied from Figures 3A and S3B) is shown for comparison. **C-E**, KPC-EV and KPC-IDO1 cells were injected subcutaneously into the flanks of C57Bl6/J mice (as shown and used in Figure 4A & B), once tumours had formed the mice were given a single by intraperitoneal injection of 800 $\mu$ l 120mM <sup>13</sup>C<sub>11</sub> tryptophan and harvested after 3h. Tumour tissue was excised and analysed by immunoblotting for the indicated proteins (**C**). Serum was analysed by GCMS for formate (**D**) and LCMS for serine and purine nucleotides (**E**) (n=7 mice in each group, bars are SD). **F**, Cartoon illustrating the rationale for use of immunocompromised mice with stable IDO1-expressing (KPC-IDO1) tumour cells to specifically interrogate the metabolic effects of IDO1 inhibition on tumour growth. **G**, Area under the curve analysis was performed on the tumour volume data presented in Figure 4E & F, bars are standard error of mean.

Supplemental Figure 5.

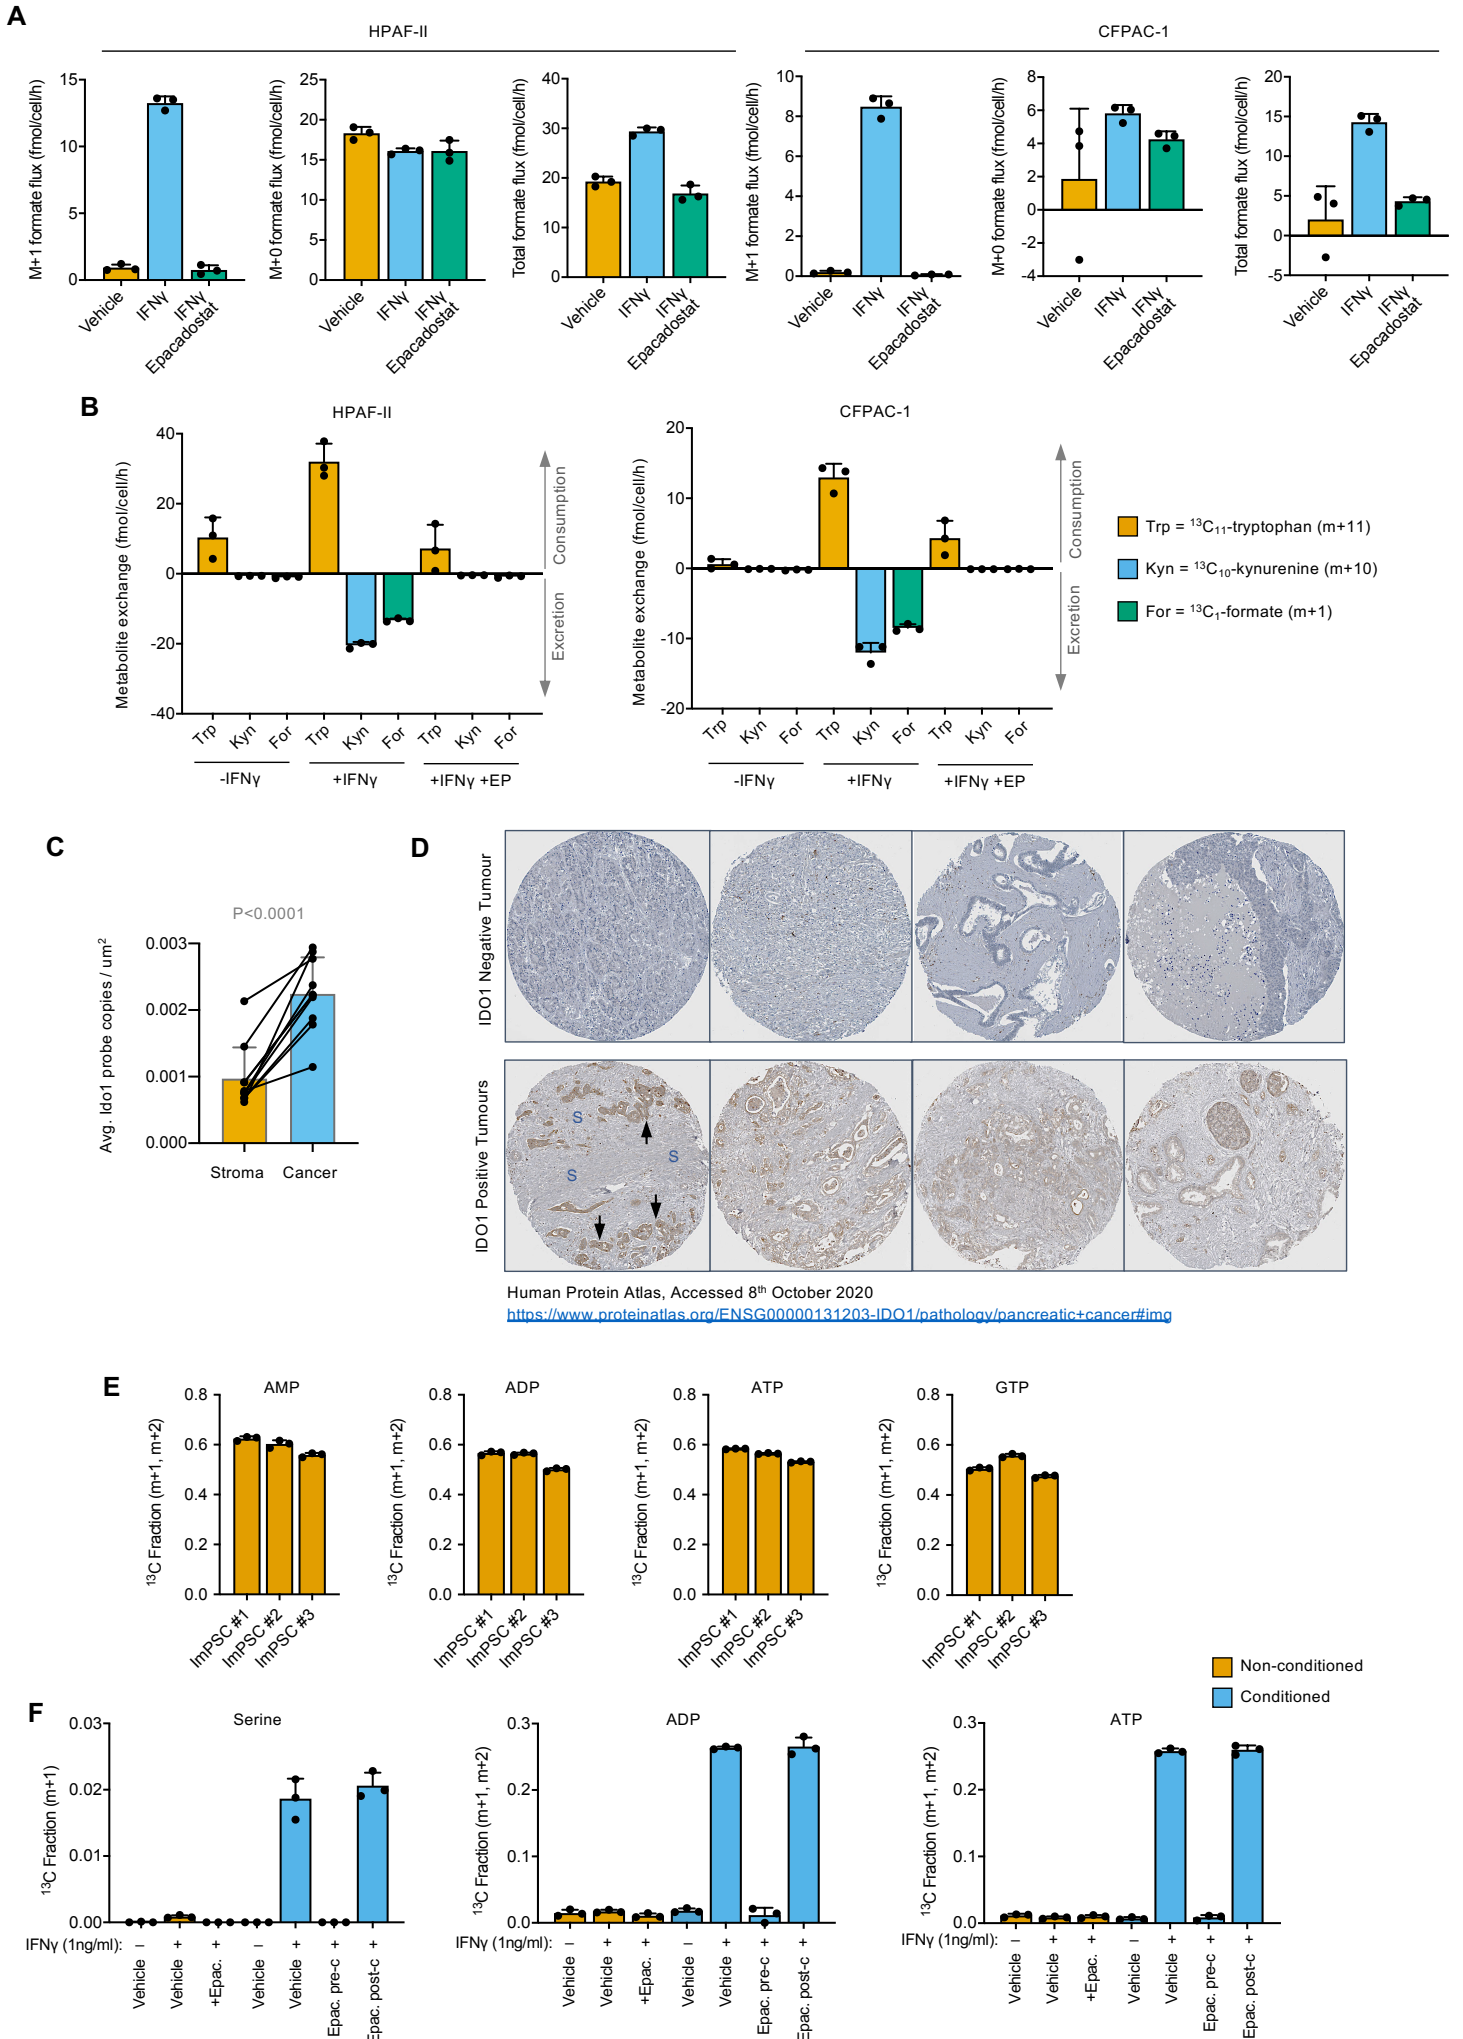

## Supplemental Figure 5.

### Formate metabolism in PDAC and pancreatic stellate cells. Related to Figure 5.

**A & B**, HPAF-II and CFPAC-1 cells were treated with IFN $\gamma$  (1ng/ml) with or without epacadostat (1 $\mu$ M) and/or vehicle only controls in the presence of  $^{13}\text{C}_{11}$ -tryptophan for 24h. Cells were grown in complete medium containing serine and glycine (both 0.4mM) and  $^{13}\text{C}_{11}$ -tryptophan 0.4mM. Media samples were analysed by a targeted GCMS for extracellular formate (A) and by LCMS for tryptophan and kynurenine (B). (n=3 biological replicates, bars = SD). GCMS data for unlabelled (m+0), labelled (m+1) and total (m+0 + m+1) formate is shown in (A). LCMS data for labelled tryptophan (m+11) and kynurenine (m+10) are shown in (B), alongside labelled formate (m+1) data reproduced from (A) for comparison. **C**, Formalin fixed paraffin embedded tissue sections from tumours shown in Figure 1B were analysed by RNA-Scope for IDO1 transcript expression (n=10 tumours, paired 2-sided T-test, P-value shown). Contiguous tissue sections were stained by immunohistochemistry for a cancer cell marker (EpCAM) to differentiate stromal cells from cancer cells. **D**, Images of pancreatic cancer tumours stained by immunohistochemistry for IDO1 were downloaded from the Human Protein Atlas. 'S' denotes stroma, arrow heads indicate PDAC cells embedded within the stroma. **E**, Three separate immortalised murine pancreatic stellate cell lines (ImPSC#1, ImPSC#2 & ImPSC#3) were cultured for 24h in the presence of  $^{13}\text{C}_1$ -formate and intracellular metabolites were analysed by LCMS (n=3 biological replicates, bars = SD). **F**, CFPAC-1 cells were treated with IFN $\gamma$  (1ng/ml) and/or epacadostat (1 $\mu$ M) and/or vehicle only in the presence of  $^{13}\text{C}_{11}$ -tryptophan. Conditioned media were collected after 24h and ImPSC#2 cells were cultured in this media, or in non-conditioned treatment-matched media. After 24h, intracellular metabolites were analysed by LCMS (n=3 biological replicates, bars = SD).
